# Supplementary material
Source: Springer Nature journal article supplement (https://www.springermedizin.de/resource/supplementary/12884_2011_670_MOESM3_ESM.pdf/9457804)

### Birth weight

- 500-1499
- 1500-2499
- 2500-3999
- 4000-max

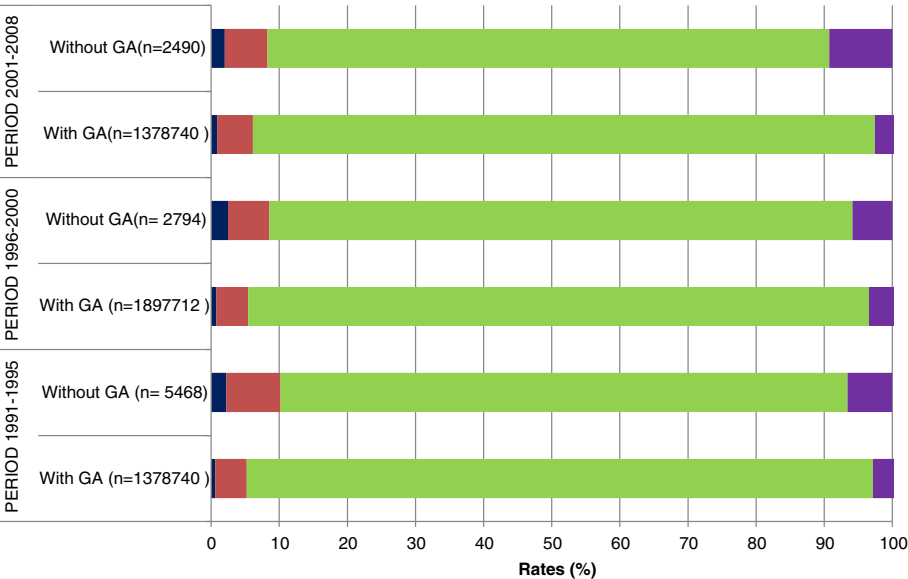

Supplement: MOESM3 [file 9457804]
